# Supplementary material for: Amination–Degradation of Super Engineering Plastics for the Construction of Surface Emissive Resin Materials
Source: Research Square preprint supplement (doi:10.21203/rs.3.rs-7303235/v1), 2025-09-08
Supplement: Supplementary file 2 [file ce58a418913a1cca770fe643.pdf]

## **Description of Additional Supplementary File**

**File Name:** Supplementary Data 1

**Description:** original  $^1\text{H}$  and  $^{13}\text{C}$  NMR spectra
